# Supplementary material
Source: ML conference proceedings conference paper supplement (https://openreview.net/forum?id=dnjTXfIapC)
Supplement: supplementary_material [file data.xlsx]

## Sheet: Rankings
Benchmark Test	Category	Question Answering							Mathematics					Code							Alignment
	Name	GPQA	MMLU-Pro	SimpleQA	FACTS Grounding	Humanity's Last Exam	SuperGPQA	ARC-AGI-2	MGSM	MATH-500	FrontierMath	AIME	HMMT February 2025	HumanEval	LiveCodeBench	SWE-bench Verified	Aider polyglot	Terminal-Bench	SciCode	IOI	IFEval	Arena-Hard	WritingBench	Creative Writing v3	IFBench	LMArena
	Release Date	2023-11-20	2024-06-03	2024-11-07	2025-01-06	2025-01-24	2025-02-20	2025-03-26	2022-10-06	2023-05-31	2024-11-07	2025-02-06	2025-02-24	2021-07-07	2024-03-12	2024-08-13	2024-12-21	2025-05-19	2024-07-18	2025-08-03	2023-11-14	2024-06-17	2025-03-07	2025-04-01	2025-07-03	2024-03-07
	Source of Release Date	https://arxiv.org/abs/2311.12022	https://arxiv.org/abs/2406.01574	https://arxiv.org/abs/2411.04368	https://arxiv.org/abs/2501.03200	https://arxiv.org/abs/2501.14249	https://arxiv.org/abs/2502.14739	https://aiwiki.ai/wiki/ARC-AGI_2	https://arxiv.org/abs/2210.03057	https://arxiv.org/abs/2305.20050	https://arxiv.org/abs/2411.04872	https://artofproblemsolving.com/wiki/index.php/2025_AIME_I	https://www.hmmt.org/www/archive/282	https://arxiv.org/abs/2107.03374	https://arxiv.org/abs/2403.07974	https://openai.com/index/introducing-swe-bench-verified/	https://aider.chat/2024/12/21/polyglot.html	https://www.tbench.ai/news/announcement	https://arxiv.org/abs/2407.13168	https://ioi2025.obi.org.bo/tasks.html	https://arxiv.org/abs/2311.07911	https://arxiv.org/abs/2406.11939	https://arxiv.org/abs/2503.05244	https://github.com/EQ-bench/creative-writing-bench	https://arxiv.org/abs/2507.02833	https://arxiv.org/abs/2403.04132
	Source of Ranking and Data	VALS	Authors	KG	KG	Authors	Authors	AI WIKI	VALS	VALS	EPOCH AI	VALS	MathArena	LLM Leaderboard	Authors	SWE-bench	Authors	Authors	LLM Leaderboard	VALS	HELM	Authors	Authors	Authors	LLM Leaderboard	Authors
	Link to Data Source	https://www.vals.ai/benchmarks/gpqa-09-08-2025	https://huggingface.co/spaces/TIGER-Lab/MMLU-Pro	https://www.kaggle.com/benchmarks/openai/simpleqa	https://www.kaggle.com/benchmarks/google/facts-grounding	https://agi.safe.ai/	https://supergpqa.github.io/	https://arcprize.org/leaderboard	https://www.vals.ai/benchmarks/mgsm-2025-09-08	https://www.vals.ai/benchmarks/math500-05-30-2025	https://epoch.ai/frontiermath	https://www.vals.ai/benchmarks/aime-2025-09-08	https://matharena.ai/?comp=hmmt--hmmt_feb_2025	https://artificialanalysis.ai/leaderboards/models	https://livecodebench.github.io/leaderboard.html	https://www.swebench.com	https://aider.chat/docs/leaderboards/	https://www.vals.ai/benchmarks/terminal-bench-2025-09-18	https://artificialanalysis.ai/leaderboards/models	https://www.vals.ai/benchmarks/ioi-09-09-2025	https://crfm.stanford.edu/helm/capabilities/latest/#/leaderboard	https://github.com/lmarena/arena-hard-auto?tab=readme-ov-file#leaderboard	https://huggingface.co/spaces/WritingBench/WritingBench	https://eqbench.com/creative_writing.html	https://artificialanalysis.ai/leaderboards/models?deprecation=all&reasoning=reasoning%2Cno_reasoning	https://lmarena.ai/leaderboard
Model ↓	Ranking ↘	Average	Overall	Correct	Score	Accuracy	Overall	Accuracy	Accuracy	Accuracy	Tier 1-3 Accuracy	Accuracy	Accuracy	Accuracy	Overall	Bash Only % Resolved	Percent correct	Overall	Accuracy	Accuracy	Strict Acc	Score	Overall	Elo Score	Accuracy	Overall	Coding	Math	Instruction Following
gemini-2.5-pro			12	1	2	3	2				8		7	4		8		14	5	3			9		23	1456	1470	1469	1444
claude-opus-4-1-20250805-thinking-16k																		4	11							1449	1504	1459	1455
o3-2025-04-16		3		3	27	4	4		18		13	9		1	2	5	10	3	9		14	1	7	1	3	1442	1465	1461	1407
chatgpt-4o-latest-20250326														29					42				20	10		1441	1468	1396	1416
gpt-4.5-preview-2025-02-27						16											39					12	29	28		1441	1460	1415	1429
gpt-5-high			5				1	2			1		4	3			1	6	4						2	1441	1467	1454	1416
claude-opus-4-1-20250805		19		10					2	13	20	26								4			11		13	1438	1496	1447	1449
gpt-5-chat							13											41	31						31	1430	1465	1414	1415
qwen3-max-preview		7							11			20						22	37	5					24	1430	1474	1455	1420
claude-opus-4-20250514-thinking-16k								3										9	20						16	1421	1480	1429	1436
grok-4-0709		1	6	5		1	3		24	1	7	4	1	11				1	2	1	2				15	1420	1439	1465	1409
qwen3-235b-a22b-instruct-2507			25	4				37						31					46				5			1420	1472	1436	1408
kimi-k2-0711-preview							12							53				30	53							1419	1454	1397	1371
deepseek-r1-0528			23	14	8	6		43						21	4		15	29	15		44		8		47	1418	1458	1402	1388
deepseek-v3.1			20				9											17	27						57	1417	1454	1426	1402
kimi-k2-0905-preview																		16	83						41	1416	1449	1427	1380
deepseek-v3.1-thinking			14										5					15							40	1415	1459	1426	1413
claude-opus-4-20250514				13	18		6	37	3		23	30		23	21	1	16				6			4	34	1411	1456	1406	1408
gpt-4.1-2025-04-14		27	30	8	24	17		52	41	27	22			33		12	33	39	30		23	14	25	16		1410	1447	1368	1397
grok-3-preview-02-24														59					39							1410	1440	1384	1402
glm-4.5		17	15						27			5	9	8		7		19	57	11				21	33	1408	1452	1421	1396
mistral-medium-2508																		46	66					9	45	1407	1447	1409	1394
gemini-2.5-flash					4	8	10							36		14		38	23	10		5			20	1406	1420	1423	1396
qwen3-235b-a22b-no-thinking			80															32	89				23		26	1401	1446	1404	1377
qwen3-next-80b-a3b-instruct																			84							1401	1465	1432	1365
claude-sonnet-4-20250514-thinking-32k		12															20	7	17						14	1399	1461	1408	1408
o1-2024-12-17		14		6	16	13	8		34	21		17	25	15				40	49			11				1399	1425	1411	1398
qwen3-235b-a22b-thinking-2507			17											12				36	6				1		17	1399	1447	1412	1390
longcat-flash-chat			28																							1395	1453	1454	1384
deepseek-r1			19			11	5	37	14	14		16		13			25	63	52			10	21	14		1394	1436	1413	1388
o4-mini-2025-04-16		11		22		5			4	9	3	12			3	10				7	4	4	22			1393	1429	1430	1363
mai-1-preview																										1391	1428	1401	1367
deepseek-v3-0324		28	32						19			23	37	55			28	33	50	12			26	11		1390	1431	1374	1372
gpt-5-mini-high		5					11	11			5		3					5	24						1	1388	1413	1415	1366
claude-sonnet-4-20250514			21	21	14		14	37	5		25			16	22	3	26	12	36	6	22		14	8	30	1386	1438	1390	1383
claude-3-7-sonnet-20250219-thinking-32k											29			10			17	20	16							1385	1430	1386	1399
hunyuan-t1-20250711																										1385	1407	1407	1373
o1-preview														32									31			1385	1412	1388	1372
mistral-medium-2505										28	45	27		70				53	73						50	1382	1421	1353	1357
hunyuan-turbos-20250416			43																							1380	1408	1357	1349
qwen3-30b-a3b-instruct-2507														42					86							1380	1434	1389	1356
qwen3-coder-480b-a35b-instruct														25		6		25	48						44	1379	1438	1379	1375
gpt-4.1-mini-2025-04-14		24						55	40	26	23	24		38		16	47	52	14		8			35	54	1375	1423	1360	1360
qwen3-235b-a22b						9			10	6		11	20		9			64	19	14		9	16	24		1373	1423	1408	1352
glm-4.5-air			31										15	48				21	85						59	1372	1425	1396	1363
qwen2.5-max			53								40			51												1371	1398	1371	1350
qwen3-next-80b-a3b-thinking																		47	28						11	1371	1424	1411	1364
minimax-m1			33															85	32						38	1369	1409	1408	1340
Claude 3.5 Sonnet (10/22)		31	47	12	6	18	22		8	44	33	45		49	24		34		43		15	19		13		1368	1418	1347	1362
gemma-3-27b-it			82	29	11									75			66		156			23		25	79	1363	1370	1324	1338
grok-3-mini-high				23									13	9	12		35	26	13						27	1362	1385	1393	1356
o3-mini-high							15	17			8		16		13		22		21			6				1361	1421	1410	1359
grok-3-mini-beta			44																		1					1357	1384	1371	1348
deepseek-v3		35	55	15	30		26		16	32	35	32	41	62	23			56	55		28		32			1356	1379	1317	1336
gemini-2.0-flash-lite-preview-02-05														84					126		30					1351	1352	1329	1325
Gemini-1.5-Pro-002		33	72	18	10				36	31		37		71					92		24					1350	1356	1340	1331
gpt-oss-120b		20					17		17			2				15			44		25			43		1350	1386	1398	1314
mistral-small-2506														100				58	118						72	1350	1400	1348	1329
step-3																										1350	1421	1362	1342
command-a-03-2025		51							47	38		42		121					102						63	1346	1381	1309	1333
o3-mini		10							21	16	17	6	22	17	16		30	54	18			13	27			1346	1400	1390	1336
gpt-5-nano-high							21	20			16		14					42	41						8	1344	1385	1376	1331
hunyuan-turbos-20250226																										1344	1383	1305	1341
llama-3.1-nemotron-ultra-253b-v1																									55	1344	1403	1383	1342
gpt-4o-2024-05-13		39	65				37	55						46					82							1343	1361	1307	1316
qwen3-32b														73			42	86	54			16				1343	1373	1330	1325
qwen-plus-0125											35															1343	1407	1406	1324
glm-4.5v																		60							69	1342	1341	1300	1310
glm-4-plus-0111																										1342	1394		1332
nvidia-llama-3.3-nemotron-super-49b-v1.5																									61	1340	1386	1396	1318
Claude 3.5 Sonnet (06/20)			52								40			68												1339	1384	1341	1326
gemma-3-12b-it			107	33	12									115					173					34	62	1339	1332	1323	1315
hunyuan-turbo-0110																										1337	1369	1283	1306
o1-mini							27	47			35			18			46		76							1334	1382	1366	1325
qwq-32b			77										27	14			54		51			17	19	29	53	1334	1382	1368	1323
llama-3.1-405b-instruct-bf16							32							98				61	90					46	52	1333	1363	1316	1305
GPT-4o (08/06)			58	9	21		33		31	39	45	41	44	54	25		51									1332	1352	1310	1309
grok-2-2024-08-13			57								43			93					100							1332	1350	1296	1304
llama-3.1-405b-instruct-fp8																										1332	1357	1320	1305
gemini-advanced-0514																										1331	1339	1304	1305
step-2-16k-exp-202412																										1331	1352	1317	1308
yi-lightning			103				43																			1327	1360	1311	1302
qwen3-30b-a3b													24					59	99			18			18	1326	1378	1369	1305
gpt-oss-20b		34	63	35			29		38			7							53		53			63		1325	1377	1344	1284
llama-4-maverick-17b-128e-instruct		22						55		29	43	34		82		18	59	55	72		7			51	37	1325	1361	1327	1302
llama-3.3-nemotron-49b-super-v1		47								19		22													49	1324	1365		1318
hunyuan-large-2025-02-10																										1323	1354	1297	1308
gpt-4-turbo-2024-04-09			95											56	26				77							1322	1339	1299	1293
claude-3-opus-20240229			79											106					141							1320	1340	1311	1303
deepseek-v2.5-1210														78												1320	1360	1297	1307
step-1o-turbo-202506																										1320	1359	1313	1302
gemini-1.5-pro-001																			108							1319	1340	1297	1300
llama-4-scout-17b-16e-instruct		44						55		34	50	36		117		20		98			33		39	56	48	1319	1352	1314	1289
gemma-3n-e4b-it														133											89	1318	1334	1272	1277
gpt-4.1-nano-2025-04-14		48						55	53	33	40	33		83			64	83	122		18	25		45	78	1318	1364	1280	1293
claude-3-5-haiku-20241022		49	104	27	17				48	51	45	50		96			48		107				40	32		1317	1370	1283	1301
glm-4-plus																										1316	1344	1290	1293
llama-3.3-70b-instruct			87				39							94				89	120				42		25	1316	1336	1298	1283
amazon-nova-experimental-chat-05-14																										1315	1356	1314	1298
qwen-max-0919							36																28			1315	1343	1294	1294
GPT-4o-mini (07/18)		45	99	30	28			55	45	43		44		85	27		67		146				36	50	82	1314	1340	1280	1286
qwen2.5-plus-1127																										1313	1346	1310	1290
athene-v2-chat			64																			22				1312	1357	1316	1295
gpt-4-0125-preview																										1312	1322	1301	1280
gpt-4-1106-preview																										1312	1332	1305	1286
mistral-large-2407											45			77					110							1311	1344	1290	1290
Gemini-1.5-Flash-002		42	93		9				43	35		38		111							29					1309	1309	1291	1284
hunyuan-standard-2025-02-10																										1308	1332	1294	1274
grok-2-mini-2024-08-13			66																							1305	1326	1275	1276
deepseek-v2.5			89											90												1304	1352	1291	1283
athene-70b-0725																										1303	1336	1261	1268
mistral-large-2411		43		19					42	40		47		72				68	95		11			44		1303	1335	1284	1286
gemma-3-4b-it			155	39	29													102						36	88	1302	1297	1258	1261
qwen2.5-72b-instruct							34							79				78	113			27	34			1300	1346	1300	1284

## Sheet: Scores
Benchmark Test	Category	Question Answering							Mathematics					Code							Alignment
	Name	GPQA	MMLU-Pro	SimpleQA	FACTS Grounding	Humanity's Last Exam	SuperGPQA	ARC-AGI-2	MGSM	MATH-500	FrontierMath	AIME	HMMT February 2025	HumanEval	LiveCodeBench	SWE-bench Verified	Aider polyglot	Terminal-Bench	SciCode	IOI	IFEval	Arena-Hard	WritingBench	Creative Writing v3	IFBench	LMArena
	Release Date	2023-11-20	2024-06-03	2024-11-07	2025-01-06	2025-01-24	2025-02-20	2025-03-26	2022-10-06	2023-05-31	2024-11-07	2025-02-06	2025-02-24	2021-07-07	2024-03-12	2024-08-13	2024-12-21	2025-05-19	2024-07-18	2025-08-03	2023-11-14	2024-06-17	2025-03-07	2025-04-01	2025-07-03	2024-03-07
	Source of Release Date	https://arxiv.org/abs/2311.12022	https://arxiv.org/abs/2406.01574	https://arxiv.org/abs/2411.04368	https://arxiv.org/abs/2501.03200	https://arxiv.org/abs/2501.14249	https://arxiv.org/abs/2502.14739	https://aiwiki.ai/wiki/ARC-AGI_2	https://arxiv.org/abs/2210.03057	https://arxiv.org/abs/2305.20050	https://arxiv.org/abs/2411.04872	https://artofproblemsolving.com/wiki/index.php/2025_AIME_I	https://www.hmmt.org/www/archive/282	https://arxiv.org/abs/2107.03374	https://arxiv.org/abs/2403.07974	https://openai.com/index/introducing-swe-bench-verified/	https://aider.chat/2024/12/21/polyglot.html	https://www.tbench.ai/news/announcement	https://arxiv.org/abs/2407.13168	https://ioi2025.obi.org.bo/tasks.html	https://arxiv.org/abs/2311.07911	https://arxiv.org/abs/2406.11939	https://arxiv.org/abs/2503.05244	https://github.com/EQ-bench/creative-writing-bench	https://arxiv.org/abs/2507.02833	https://arxiv.org/abs/2403.04132
	Source of Ranking and Data	VALS	Authors	KG	KG	Authors	Authors	AI WIKI	VALS	VALS	EPOCH AI	VALS	MathArena	LLM Leaderboard	Authors	SWE-bench	Authors	Authors	LLM Leaderboard	VALS	HELM	Authors	Authors	Authors	LLM Leaderboard	Authors
	Link to Data Source	https://www.vals.ai/benchmarks/gpqa-09-08-2025	https://huggingface.co/spaces/TIGER-Lab/MMLU-Pro	https://www.kaggle.com/benchmarks/openai/simpleqa	https://www.kaggle.com/benchmarks/google/facts-grounding	https://agi.safe.ai/	https://supergpqa.github.io/	https://arcprize.org/leaderboard	https://www.vals.ai/benchmarks/mgsm-2025-09-08	https://www.vals.ai/benchmarks/math500-05-30-2025	https://epoch.ai/frontiermath	https://www.vals.ai/benchmarks/aime-2025-09-08	https://matharena.ai/?comp=hmmt--hmmt_feb_2025	https://artificialanalysis.ai/leaderboards/models	https://livecodebench.github.io/leaderboard.html	https://www.swebench.com	https://aider.chat/docs/leaderboards/	https://www.vals.ai/benchmarks/terminal-bench-2025-09-18	https://artificialanalysis.ai/leaderboards/models	https://www.vals.ai/benchmarks/ioi-09-09-2025	https://crfm.stanford.edu/helm/capabilities/latest/#/leaderboard	https://github.com/lmarena/arena-hard-auto?tab=readme-ov-file#leaderboard	https://huggingface.co/spaces/WritingBench/WritingBench	https://eqbench.com/creative_writing.html	https://artificialanalysis.ai/leaderboards/models?deprecation=all&reasoning=reasoning%2Cno_reasoning	https://lmarena.ai/leaderboard
Model ↓	Score ↘	Score	Score	Overall	Overall	Accuracy	Overall	Accuracy	Overall	Overall	Tier 1-3 Accuracy	Overall	Accuracy	Accuracy	PASS@1	Bash Only % Resolved	Percent correct	Overall	Accuracy	Overall	Strict Acc	Accuracy	Score(Official Config.)	Overall	Rubric Score	Overall	Coding	Math	Instruction Following
deepseek-r1-0528		0.319	0.824		0.834	0.14		0.011						0.97	0.844		0.714	0.15	0.4		0.784	0.4		0.7749		1418	1458	1402	1388
deepseek-v3.1					0.837		0.5932											0.23	0.39			0.38				1417	1454	1426	1402
kimi-k2-0905-preview																		0.23	0.31			0.42				1416	1449	1427	1380
deepseek-v3.1-thinking					0.848								0.8583					0.24				0.42				1415	1459	1426	1413
claude-opus-4-20250514		0.323	0.777				0.6144	0.013	0.938		0.045	0.413		0.97	0.624	0.676	0.707				0.918	0.43			0.8025	1411	1456	1406	1408
gpt-4.1-2025-04-14		0.409	0.745	0.646	0.818	0.054		0.004	0.877	0.872	0.055			0.96		0.3958	0.524	0.13	0.38		0.838		0.469	0.69	0.79	1410	1447	1368	1397
grok-3-preview-02-24														0.91					0.37							1410	1440	1384	1402
glm-4.5				0.717	0.846				0.908			0.867	0.775	0.98		0.542		0.21	0.35	0.029		0.44			0.7915	1408	1452	1421	1396
mistral-medium-2508																		0.1	0.34			0.4			0.798	1407	1447	1409	1394
gemini-2.5-flash			0.864			0.121	0.5891							0.95		28.73		0.13	0.39	0.039		0.5	0.79			1406	1420	1423	1396
qwen3-235b-a22b-no-thinking					0.6818													0.14	0.3			0.46		0.7047		1401	1446	1404	1377
qwen3-next-80b-a3b-instruct																			0.31							1401	1465	1432	1365
claude-sonnet-4-20250514-thinking-32k				0.745													0.613	0.3	0.4			0.55		0.8134		1399	1461	1408	1408
o1-2024-12-17		0.472	0.788	0.73		0.08	0.6024		0.893	0.904		0.715	0.4833	0.97				0.12	0.36				0.559			1399	1425	1411	1398
qwen3-235b-a22b-thinking-2507					0.845									0.98				0.13	0.42			0.51				1399	1447	1412	1390
longcat-flash-chat					0.827																					1395	1453	1454	1384
deepseek-r1					0.84	0.085	0.6182	0.013	0.923	0.922		0.74		0.98			0.569	0.06	0.36				0.58	0.7054	0.794	1394	1436	1413	1388
o4-mini-2025-04-16		0.205		0.745		0.181			0.934	0.942	0.193	0.837			0.845	0.45				0.053	0.929		0.746	0.7052		1393	1429	1430	1363
mai-1-preview															0											1391	1428	1401	1367
deepseek-v3-0324				0.611	0.813				0.917			0.522	0.2917	0.92			0.551	0.14	0.36	0.017				0.6774	0.768	1390	1431	1374	1372
gpt-5-mini-high				0.803			0.5882	0.044			0.19		0.8917					0.31	0.39			0.75				1388	1413	1415	1366
claude-sonnet-4-20250514		0.231	0.791		0.837		0.5701	0.013	0.93		0.041			0.97	0.594	0.6493	0.564	0.26	0.37	0.065	0.839	0.45		0.7413	0.7885	1386	1438	1390	1383
